# Supplementary material for: A pseudorotaxane-based molecular machine controlled by light and thermal stimuli
Source: Royal Society of Chemistry journal article supplement (doi:10.1039/b303269h), 2003-01-01
Supplement: b303269h.doc [file b303269h.doc]

*Electronic Supplementary Information*

Title A pseudorotaxane-based molecular machine controlled by light and thermal stimuli

Author Kyu-Sung Jeong, Kyoung-Jin Chang and Young-Jae An

Contents
1. Synthesis of thread **1** and macrocycle **6**

2. 1H – 1H NOESY spectra of *trans*-**1** and *cis*-**1**
3. Modeling structures of *trans*-**1** and *cis*-**1**

4. UV-visible spectra change of thread **1** upon irradiation

5. 1H NMR spectral changes of thread **1** induced by irradiation and heating

1. Synthesis of thread **1** and macrocycle **6**

**General Experimental Methods:** All reagents were, unless otherwise noted, used as purchased. Chloroform was distilled under nitrogen from calcium hydride, toluene and tetrahydrofuran from Na/benzophenone, and triethylamine from KOH. Melting points were uncorrected. All NMR spectra were recorded on a DRX-500 spectrometer and chemical shifts were reported in ppm downfield relative to TMS (0 ppm) for 1H NMR, and the residual solvent peak (CHCl3: 77 ppm) for 13C NMR spectrum. Infrared spectra were obtained with a Nicolet impact 410 FT-IR spectrometer and FAB-MS spectra were obtained with a JEOL, JMS-AX505WA mass spectrometer.

**2,7-Di-*tert*-butyl-9,9-dimethyl-4,5-dinitro-9H-xanthene (3):** To a suspension of 2,7-bis(1,1-dimethyl)-9,9-dimethylxanthene **2**1 (2.70 g, 0.73 mol) in acetic acid (300 mL) was added dropwise fuming nitric acid (30 mL) in acetic acid (30 mL) for 1 h at room temperature, the solution was stirred for 42 h at room temperature. Precipitates were filtered, washed with water (3 × 5 mL) and dried in vacuo. White solid (1.70 g, 49%); mp 296-298 oC; *Rf*: 0.15 (CH2Cl2:*n*-Hex=1:1); 1H NMR (500 MHz, CDCl3):  (ppm)7.78 (d, *J* = 4.4 Hz, 2H), 7.65 (d, *J* = 4.4 Hz, 2H), 1.67 (s, 6H), 1.36 (s, 18H); 13C NMR (126 MHz, CDCl3):  (ppm)147.7, 141.1, 139.3, 132.4, 127.5, 121.4, 35.8, 35.5, 32.6, 31.8; IR (KBr) 1600, 1265 cm-1; Anal. Calcd for C23H28N2O5: C, 66.97; H, 6.84; N, 6.79; Found: C, 66.92; H, 6.87, N, 6.76.

**2,7-Di-*tert*-9,9-dimethyl-9H-xanthene-4,5-diamine (4):** Compound **3** (0.90 g, 2.4 mmol) was dissolved in THF(50 mL) and a catalytic amount of Raney Ni was added. The solution was stirred under H2 balloon for 1 h. The catalyst was filtered off through celite and the solvent was evaporated to yield **4** as a white solid (0.71 g, 93%); mp 210-211 ℃; *Rf*: 0.46 (EtOAc:CH2Cl2=1:5); 1H NMR (500 MHz, CDCl3): (ppm) 6.84 (s, 2H), 6.69 (s, 2H), 3.80 (s, 4H; NH2), 1.61(s, 6H), 1.30 (s, 18H); 13C NMR (126 MHz, CDCl3): ppm) 135.6, 133.5, 127.5, 113.1, 111.8, 110.4, 35.8, 32.5, 32.0, 31.0; IR(KBr) 3400 cm-1; Anal. Calcd for C23H32N2O: C, 78.36; H, 9.15; N, 7.95. Found: C, 78.35; H, 9.13, N, 7.94.

(1) J. S. Nowick, P. Ballester, F. Ebmeyer and J. Rebek, Jr., *J. Am. Chem. Soc*., 1990, **112**, 8902.

**2,7-Di-*tert*-9,9-dimethyl-5-phenylazo-9H-xanthen-4-ylamine (5):** A solution of compound **4** (0.16

g, 0.45 mmol), nitrosobenzene (0.48 mg, 0.45 mmol, 1 equiv) and two drops of acetic acid in CHCl3 (6 mL) was stirred at room temperature under argon.2 After stirring 12 h, the solution was diluted with CHCl3 washed with saturated NaHCO3 solution and brine, and dried over anhydrous MgSO4. After concentration, the residue was purified by column chromatography (CH2Cl2:*n*-Hex=1:1) to give **5** as a redish solid (0.12 g, 61%); *Rf*: 0.47 (CH2Cl2:*n*-Hex=1:1); mp 180-182 ℃; 1H NMR (500 MHz, CDCl3): (ppm) 7.97 (d, *J*= 6.7 Hz, 2H), 7.62-7.46 (m, 5H), 6.85 (d, *J*= 2.1 Hz, 1H), 6.73 (d, *J*= 2.1 Hz, 1H), 4.04 (s, 2H; NH2), 1.69 (s, 6H), 1.34 (s, 9H), 1.32 (s, 9H); 13C NMR (126 MHz, CDCl3):  146.7, 145.8, 140.6, 137.1, 133.0, 130.7, 129.2, 128.8, 127.0, 126.5, 123.4, 122.7, 116.6, 112.8, 112.1, 111.5, 35.1, 32.3, 32.2, 32.1; IR(KBr) 3410, 1480 cm-1; Anal. Calcd for C29H35N3O: C, 78.87; H, 7.99; N, 9.52. Found: C, 78.87; H, 7.98; N, 9.51.

***N*-(2,7-Di-*tert*-butyl-9,9-dimethyl-5-phenylazo-9H-xanthen-4-yl)-*N’,N’*-diethyl-terephthalamide**

**(1):** To a solution of terephthaloyl chloride (0.11 g, 0.56 mmol) in CHCl3 (35 mL) was added dropwise compound **5** (0.25 g, 0.56 mmol, 1 equiv) and triethylamine (0.20 mL, 1.1 mmol, 2 equiv) in CHCl3 (20 mL) for 2 h at 0 oC (ice-water bath) under argon. After stirring for 2.5 h at room temperature, diethylamine (0.3 mL, 3.36 mmol, 6 equiv) was added at 0 oC and the mixture was stirred for 4 h at room temperature. The organic solution was washed with saturated NaHCO3 solution and brine, and dried over anhydrous MgSO4. After concentration, the residue was purified by column chromatography (EtOAc) to give **1** as a redish solid (90 mg, 26%); *Rf*: 0.63 (EtOAc); mp 238-240 ℃; 1H NMR (500 MHz, CDCl3): (ppm) 8.98 (s, 1H; NH), 8.63 (s, 1H), 7.87 (d, *J* = 7.8 Hz, 2H), 7.79 (s, 2H), 7.62

7.62 (s, 1H), 7.55 (s, 1H), 7.50-7.41 (m, 3H), 7.24 (s, 1H), 7.09 (d, *J* = 7.8 Hz, 2H), 3.58 (m, 2H), 3.16 (m, 2H), 1.74 (s, 6H), 1.59 (s, 6H), 1.38(s, 9H); 13C NMR (126 MHz, CDCl3): (ppm) 164.5, 152.5,

(2) (a) W. Shuangxi and C. A. Rigiberto, *Org. Lett*., 2001, 3, 3831; (b) M. H. Davey, V. Y. Lee, R. D. Miller and T. J. Marks, *J. Org. Chem*., 1999, 64, 4976.

147.1, 146.3, 141.4, 140.4, 137.1, 135.3, 131.6, 130.1, 128.8, 127.6, 126.5, 125.2, 123.3, 122.7, 122.0, 117.6, 116.3, 114.9, 112.9, 40.8, 34.9, 31.9, 31.7, 31.5, 13.2; IR(KBr) 3287, 1688, 1480 cm-1; Anal. Calcd for C41H48N4O3: C, 76.37; H, 7.50; N, 8.69. Found: C, 76.36; H, 7.48; N, 8.68.

**4-Nitro-pyridine-2,6-dicarbonyl bis(diamine) 9:** 1,1-Bis-(4-amino-3,5- dimethylphenyl)cyclohexane **8** 3 (3.89 g, 12.0 mmol, 3 equiv) was dissolved in CH2Cl2 (20 mL) and 0.5 mL of *N,N*-diisopropylethylamine (2 mL, 12.0 mmol, 3 equiv) was added. The solution of 4-nitro-pyridine-2,6-dicarbonyl dichloride **7** 4 ( 1.00 g, 4.0 mmol) in CH2Cl2 (17 mL) was added dropwise for 3 h at 0 oC (ice-water bath) under argon and the solution was stirred for 11 h at room temperature. The solution was washed with saturated NaHCO3 solution and brine, and dried over anhydrous MgSO4.

After concentration, the residue was purified by column chromatography (EtOAc:CHCl3=1:6) to give **9** as a brown solid (1.04 g, 32%); *Rf*: 0.2 (EtOAc:CHCl3=1:6); mp >300℃; 1H NMR (500 MHz, CDCl3): (ppm) 9.17 (s, 2H), 8.86 (s, 2H; NH), 6.80 (s, 4H), 3.46 (s, 4H; NH2), 2.20 (s, 22H), 2.15 (s, 12H), 1.54 (s, 16H); 13C NMR (126 MHz, CDCl3):(ppm) 165.2, 159.4, 152.4, 149.0, 145.6,

(3) (a) C. A. Hunter, *J. Am. Chem. Soc*., 1992, **114**, 5303-5311. (b) F. J. Carver, C.A. Hunter, R. J. Shannon, *J. Chem. Soc., Chem. Commun*., 1994, 1277.

(4) J. S. Bradshaw, G. E.Mass, J. D. Lamb, R. M. Izatt, J. J. Christensen, *J. Am. Chem. Soc*. 1980, **102**, 467.

140.1, 137.1,134.3, 129.7, 127.2, 127.0, 126.9, 124.7, 121.4, 120.0, 44.9, 37.2, 23.0, 19.0, 18.1; IR(KBr) 3410, 3287, 1600, 1693 cm-1; Anal. Calcd for C51H60N6O4: C, 74.60; H, 7.37; N, 10.24. Found: C, 74.58; H, 7.36; N, 10.20.

**Tetralactom macrocycle 6:** Compound **9** (0.99 g, 1.2 mmol) was dissolved in CH2Cl2 (10 mL) and 4-nitro-pyridine-2,6-dicarbonyl dichloride **7** (0.30 g, 1.2 mmol, 1 equiv) was separately dissolved in CH2Cl2 (10 mL). These two solutions were dropwise added to CH2Cl2 (20 mL) and *N,N*-diisopropylethylamine (0.6 mL, 3.6 mmol, 3 equiv) for 3 h at room temperature under argon. The solution was stirred for additional 15 h at room temperature. The organic solution was washed with saturated NaHCO3 solution and brine, and dried over anhydrous MgSO4. After concentration, the residue was purified by column chromatography (EtOAc:CH2Cl2=1:20) to give **6** as a yellow solid (0.27 g, 23%); *Rf*: 0.3 (EtOAc:CH2Cl2=1:20); mp >300 ℃; 1H NMR(500 MHz, CDCl3): (ppm) 9.18 (s, 4H), 8.82 (s, 4H; NH), 6.99 (s, 8H), 2.29 (m, 9H), 2.15 (s, 15H), 1.64 (m, 10H); 13C NMR (126 MHz, CDCl3): (ppm) 159.0, 152.0, 159.0, 149.0, 134.6, 127.6, 126.3, 119.2, 45.0, 37.2, 223.0, 19.4, 18.5; IR(KBr) 3414, 1704, 1600 cm-1; Anal. Calcd for C58H60N8O8: C, 69.86; H, 6.06; N, 11.24. Found: C, 69.84; H, 6.05; N, 11.22.

2. 1H – 1H NOESY spectra of *trans*-**1** and *cis*-**1**


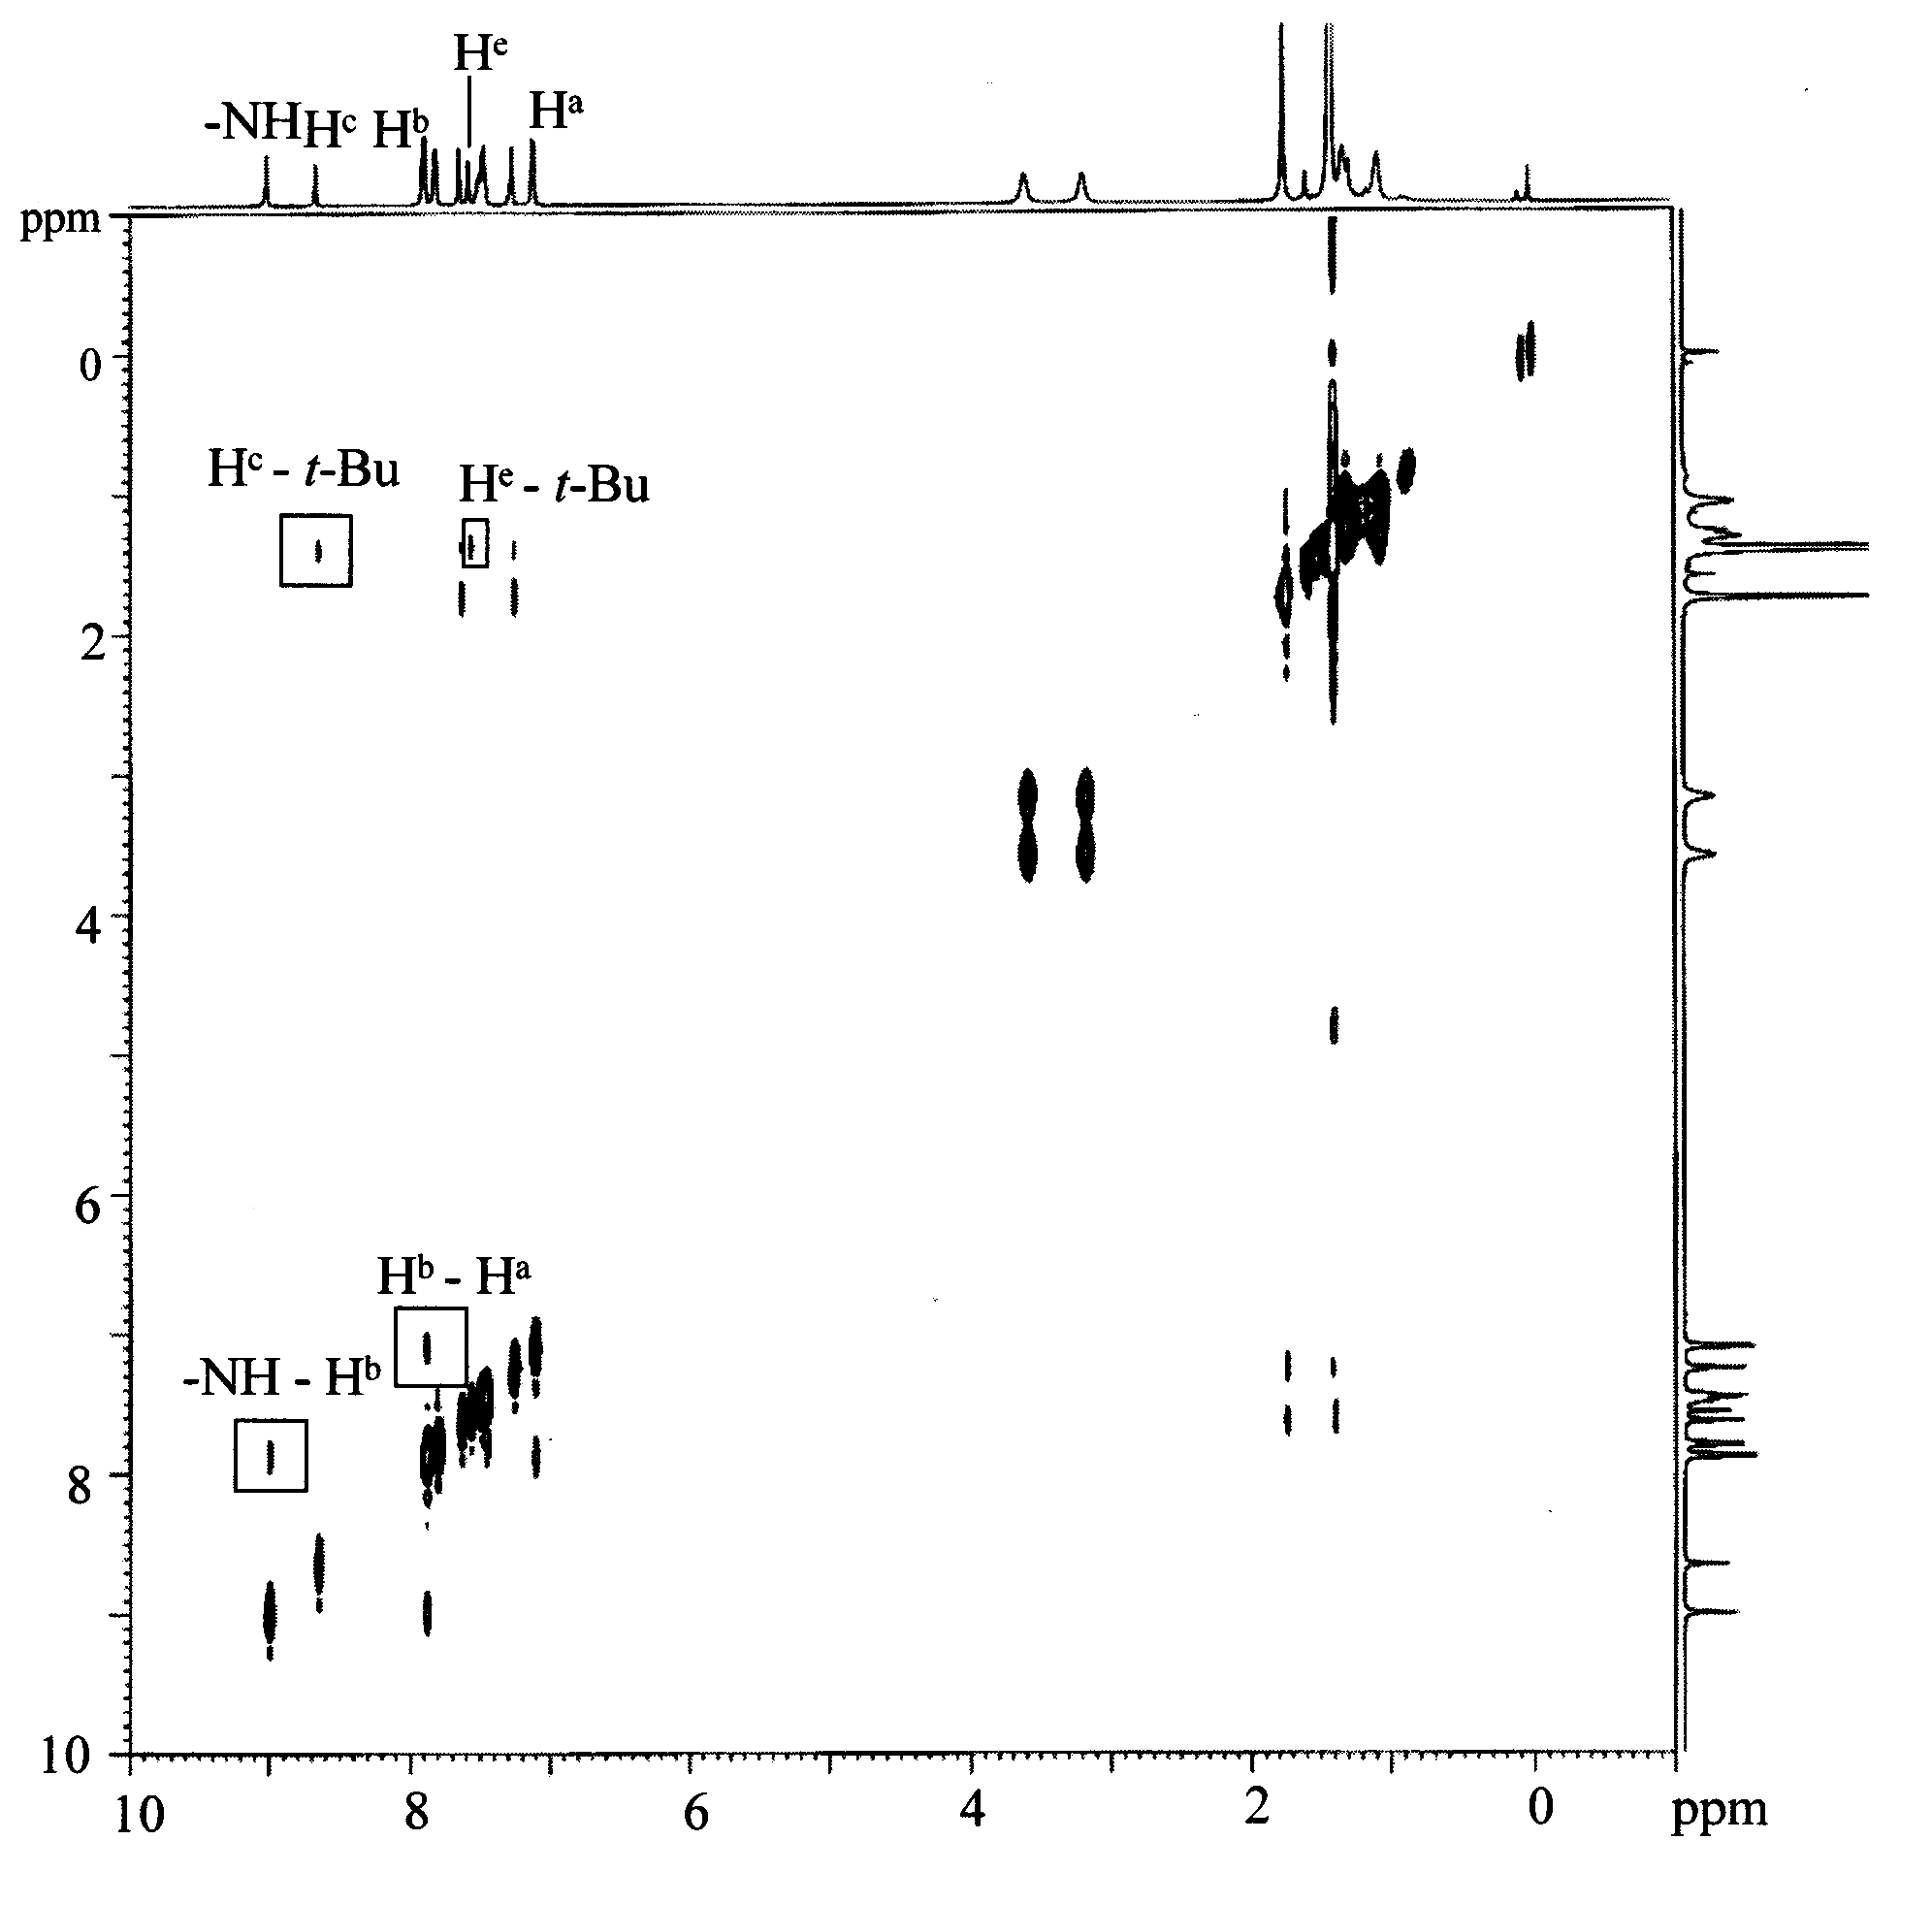


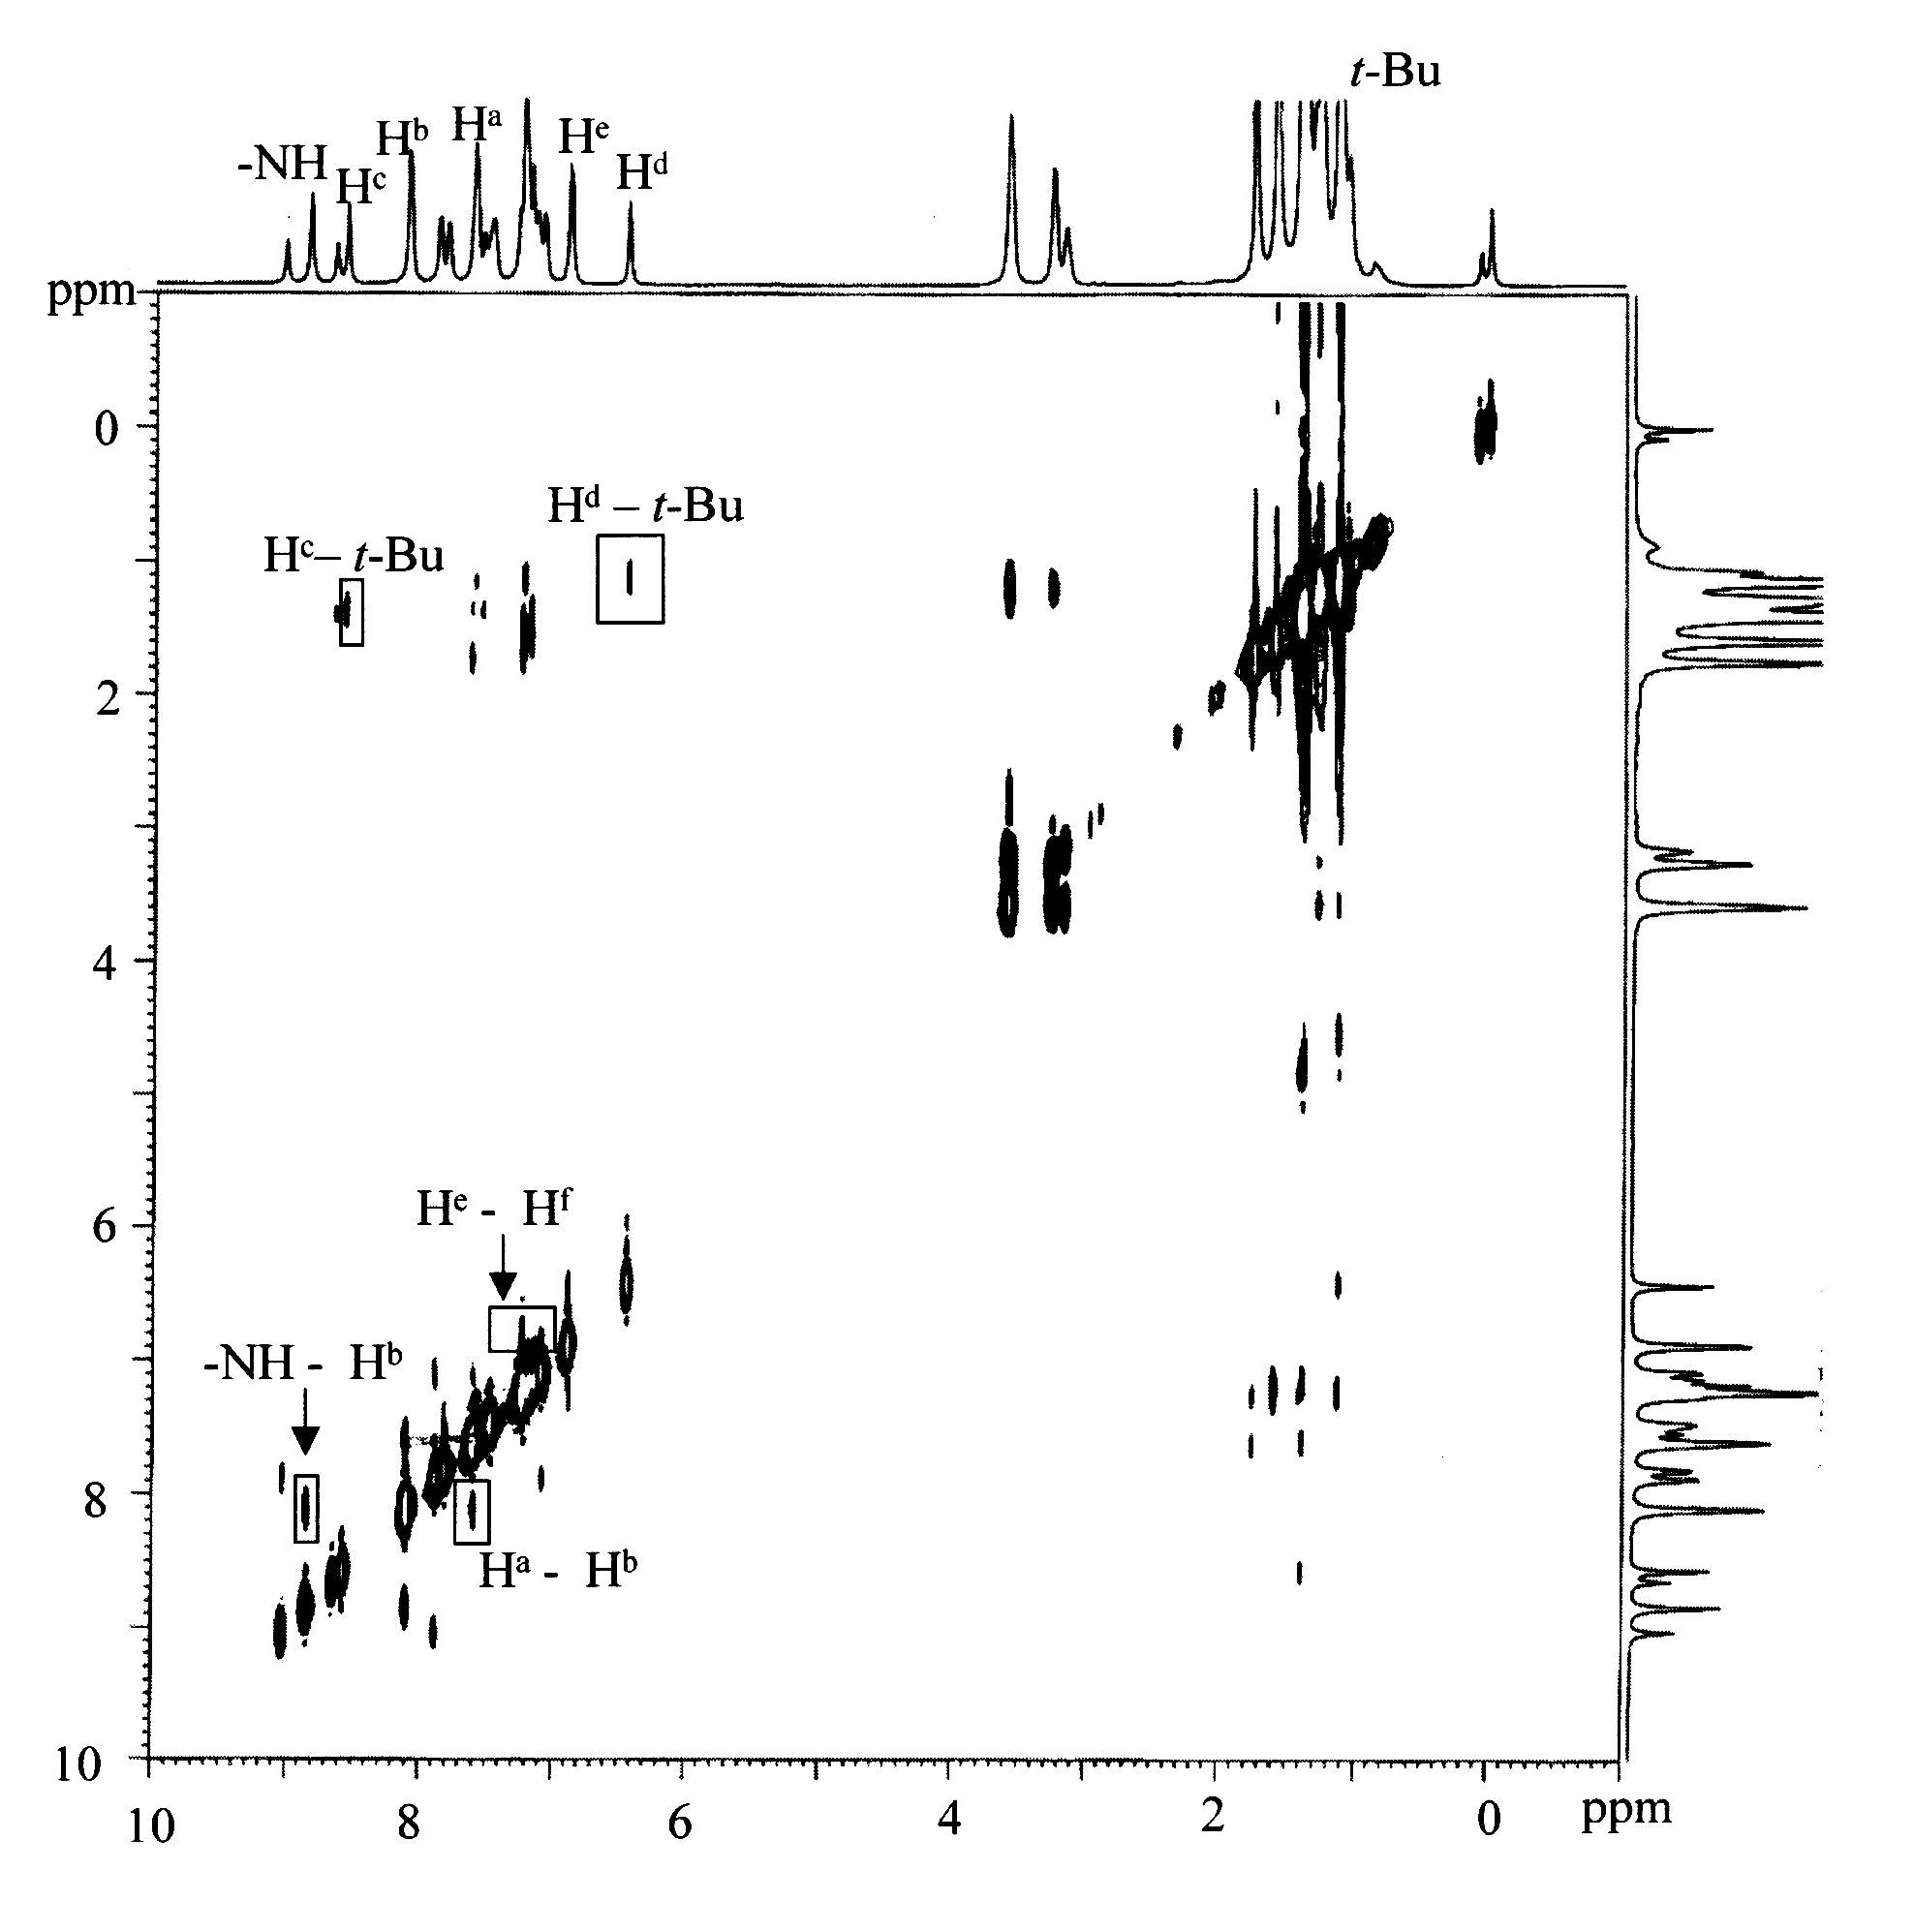


**Fig. S1** 1H-1H NOESYspectrum of *trans*–**1**(top) and *cis***-1**(bottom) in CDCl3 at 5 oC (500 MHz, mixing time = 0.6 s, relaxation delay = 2 s).

ppm

3. Modeling structure of *trans***-1** and*cis***-1**

The energy-minimized structure of *trans-***1** and *cis***-1** were obtained from MacroModel 5 7.1 program on a Silicon Graphics Indigo2 IMPACT workstation. The structures was generated with MM2* force field via 1000 separated search steps in Monte Carlo conformational search.


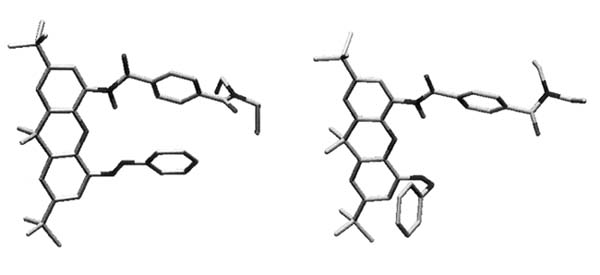


**Fig. S2** Energy-minimized structures of *trans***-1**(left) and *cis***-1**(right).

4. UV-visible spectra change of thread **1** upon irradiation


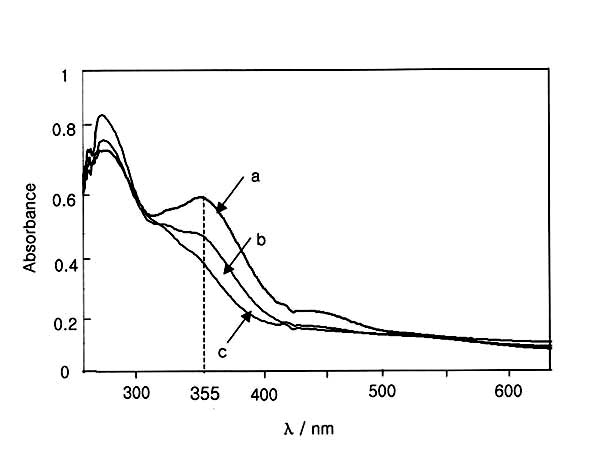


**Fig. S3** UV-visible absorptionspectra of a CHCl3 solution of the thread **1** (2.0ⅹ10-5 M) that initially contains in approximately 94:6 ration of *trans*-**1** and *cis*-**1** isomer: (a) no irradiation, (b) 1.5 h irradiation and (c) 3 h irradiation with the long-wave (365 nm) UV light produced by a commercial UV lamp for the TLC detection.

(5) F. Mohamedi, N. G. T. Richards, W. C. H. Liskamp, M. Lipton, C. Caufield, G. Chang, T. Hendrickson, W. C. Still, *J. Comp. Chem*., 1990, **11**, 440.

5. 1H NMR Spectral changes of thread **1** induced by irradiation and heating


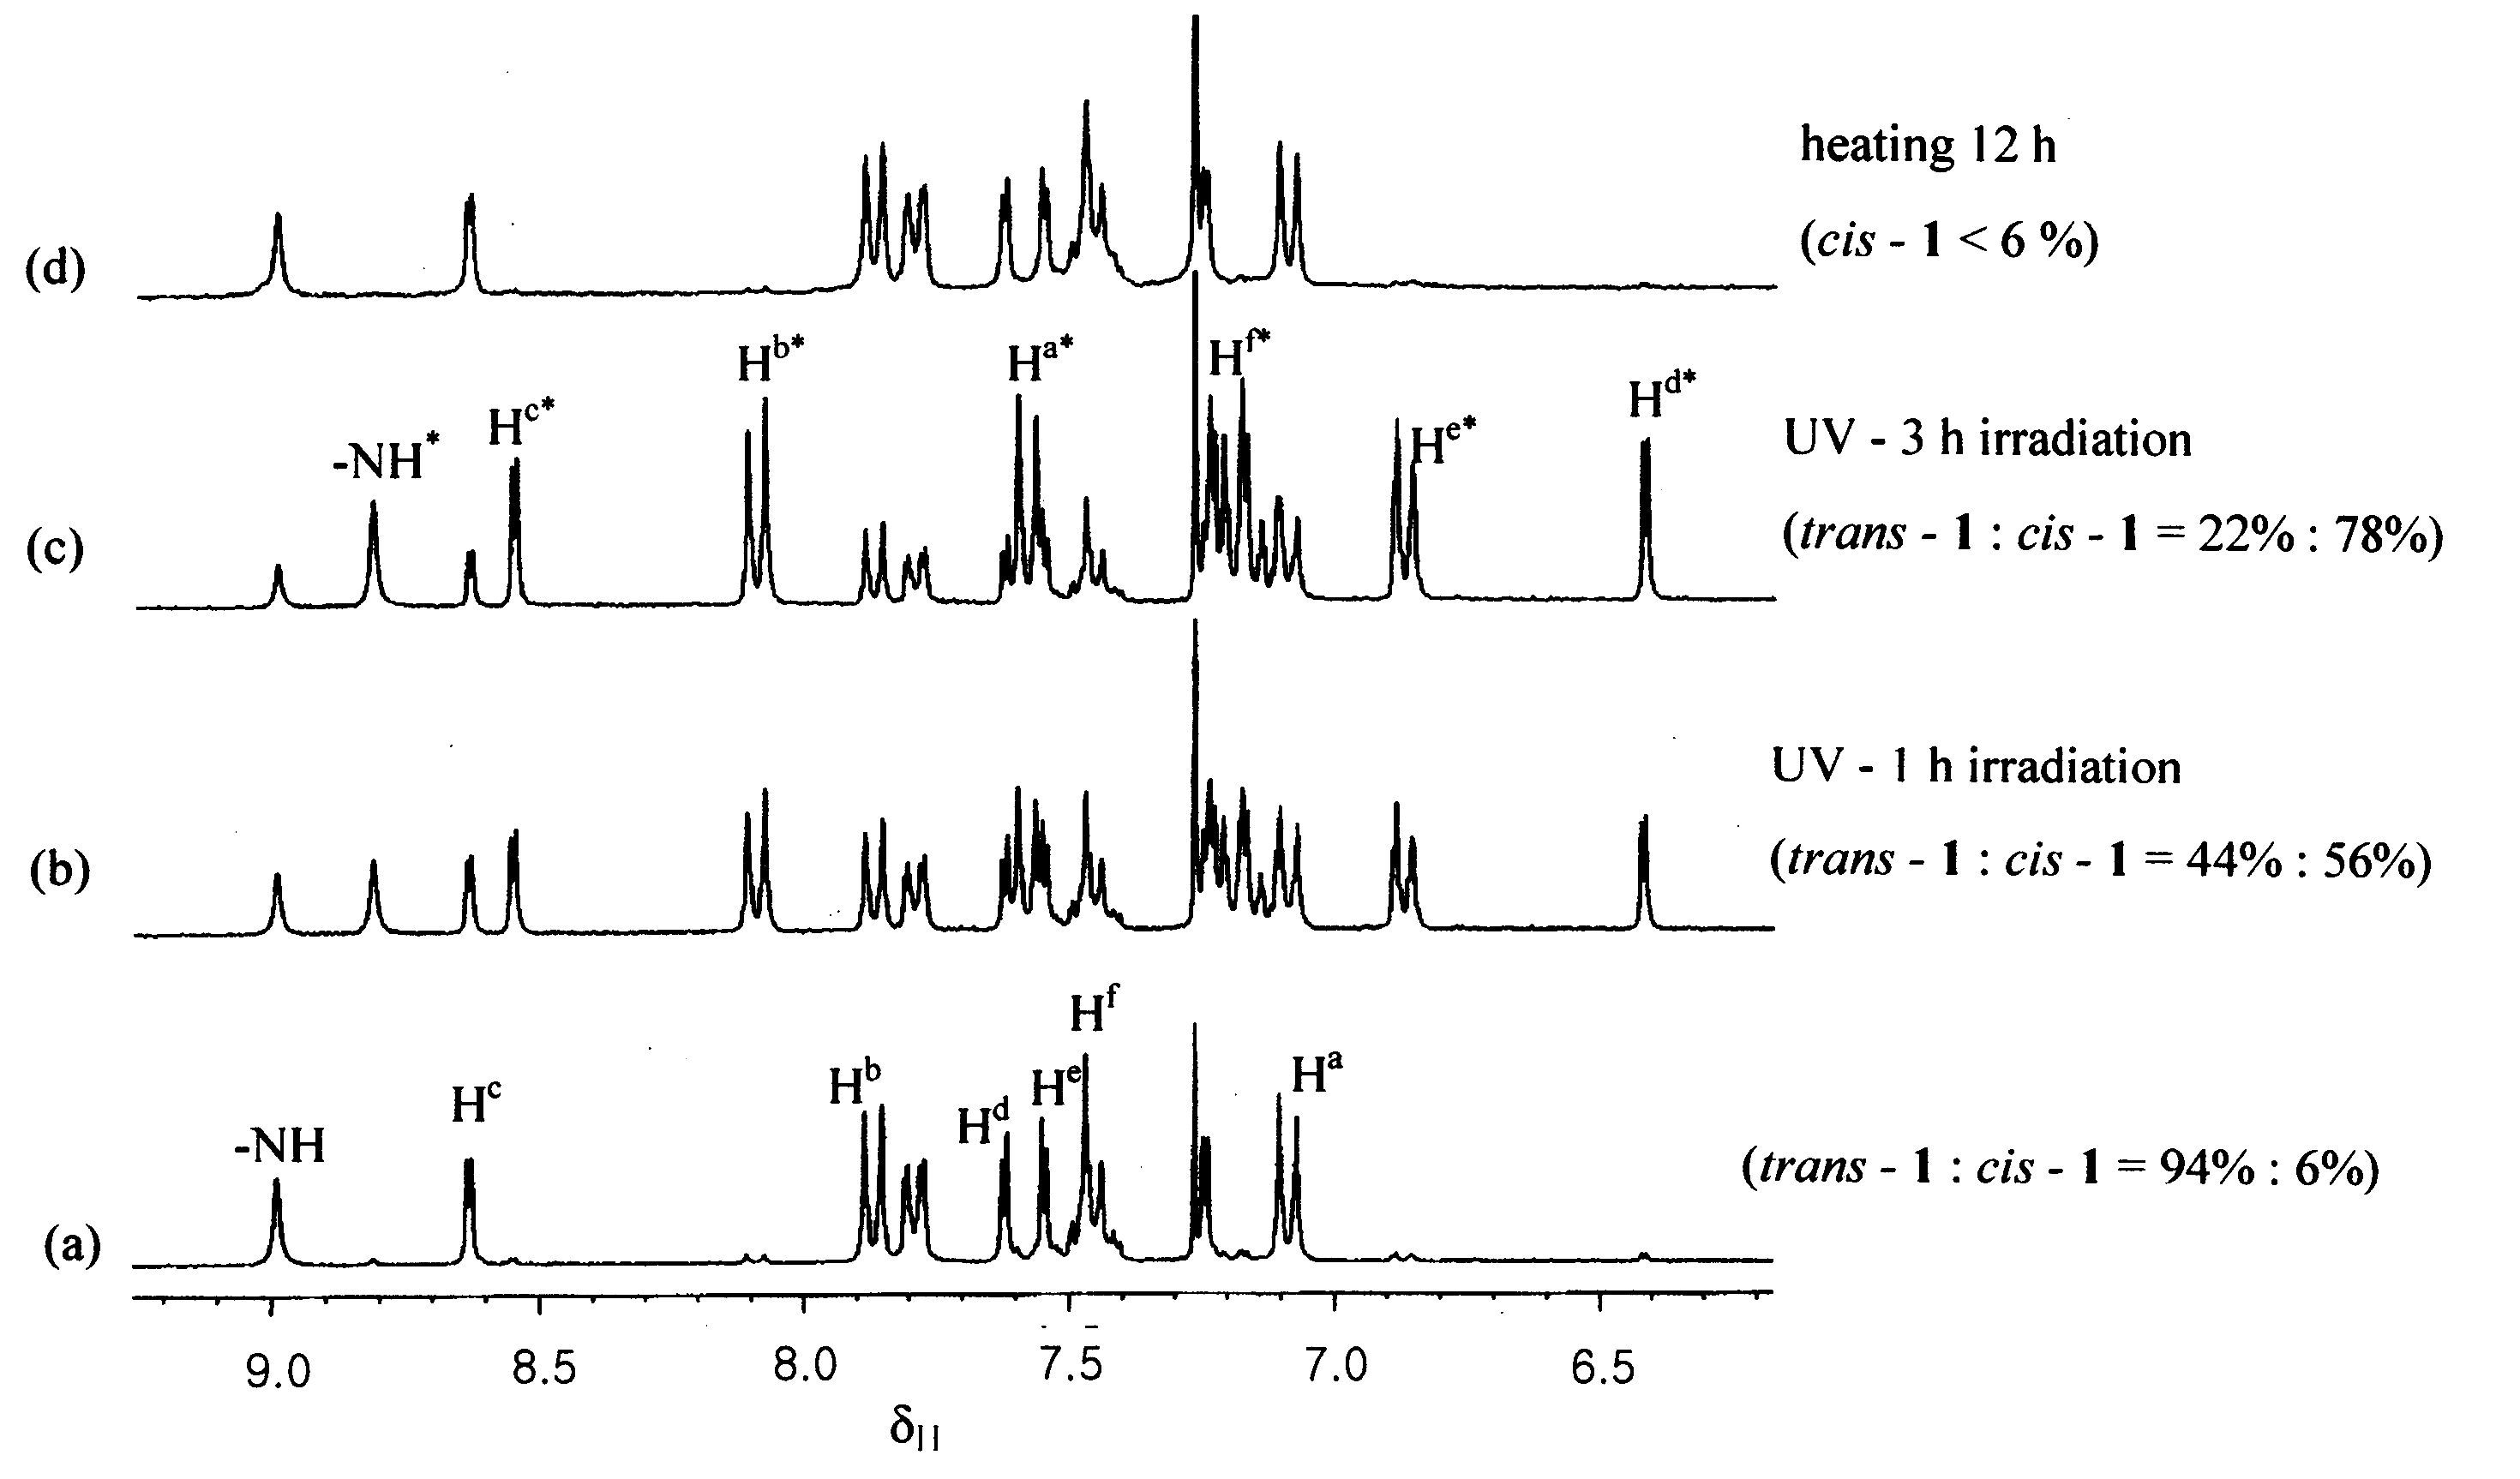


**Fig. S4** Partial 1H NMR spectra (500 MHz, CDCl3, 5 oC) of thread **1**; (a) *trans* - **1**/ *cis -* **1**= 94% : 6%; (b) after irradiation for 1 h (*trans* - **1**/ *cis -* **1** *=* 44% : 56%); (c) after irradiation for 3 h irradiation (*trans -* **1** / *cis -* **1** = 22% : 78%); (d) after heating (50~55℃) for 12 h (*cis* - **1** < 6%). The irradiation experiments were performed with the long-wave (365 nm) UV light produced by a commercial UV lamp for the TLC detection.
